# Supplementary material for: Prediction of Type III Secretion Signals in Genomes of Gram-Negative Bacteria
Source: PubMed Central journal article supplement (PMC2690842; doi:10.1371/journal.pone.0005917), 2009-06-15

A

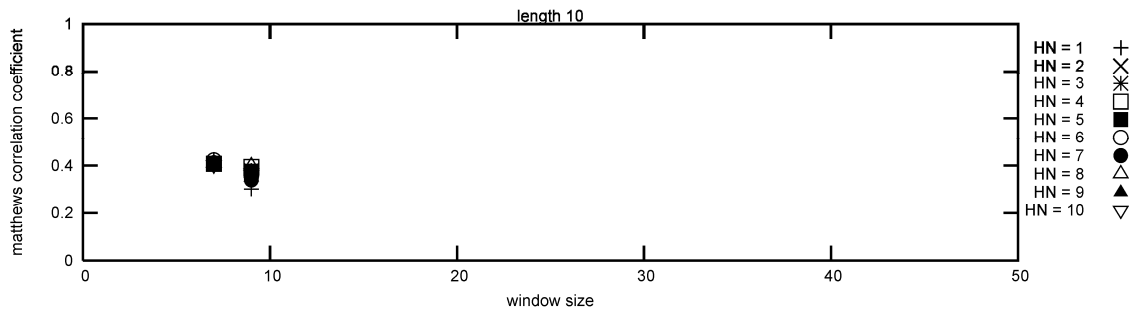

B

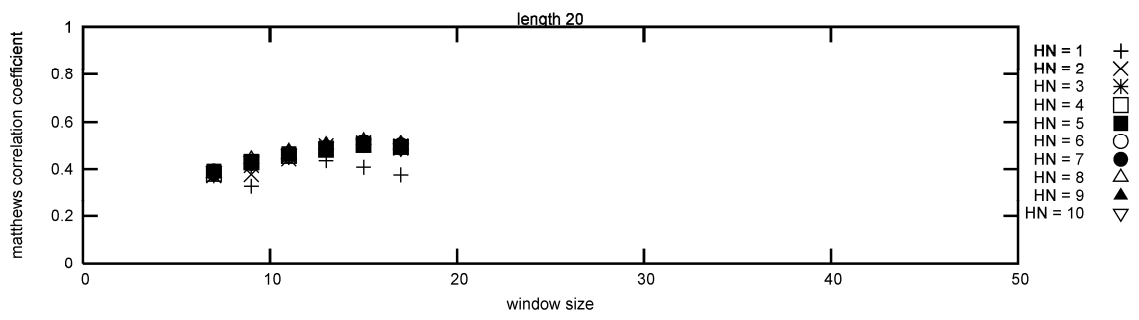

C

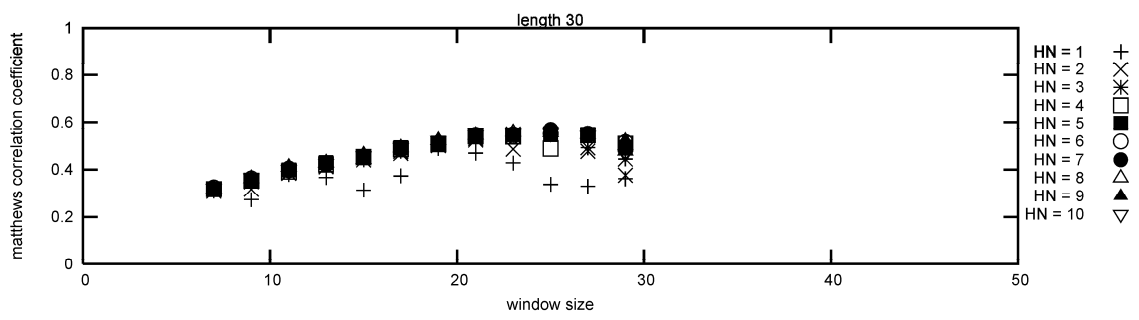

D

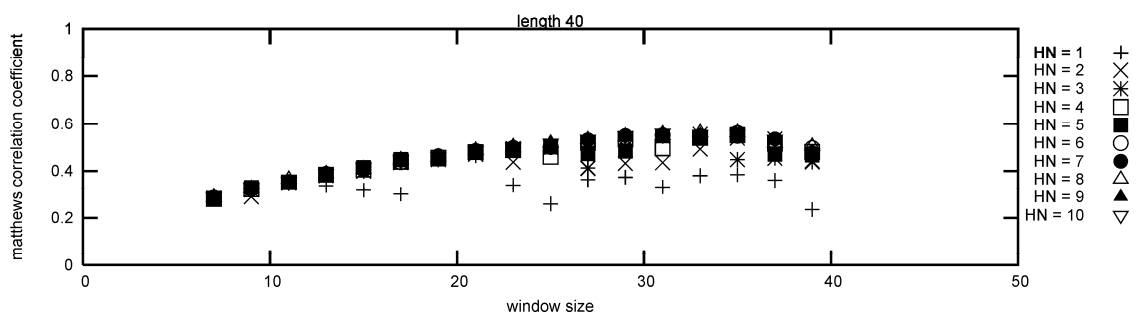

E

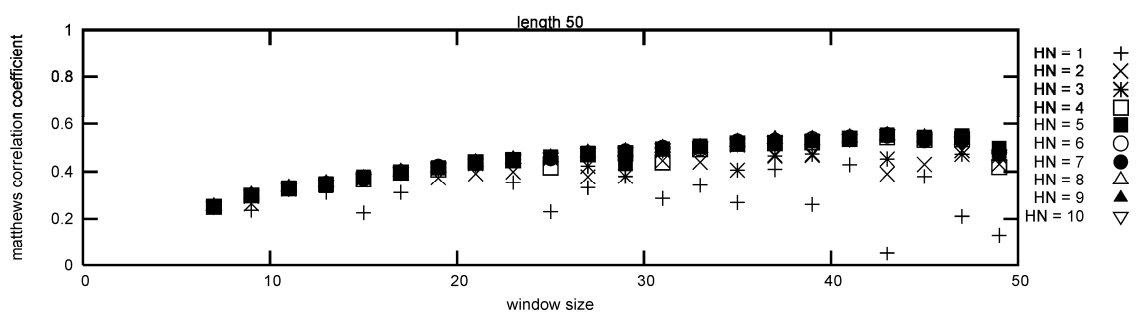

Supplement: pone.0005917.s001.pdf [file pone.0005917.s001.pdf]
