# Supplementary material for: Prediction of Type III Secretion Signals in Genomes of Gram-Negative Bacteria
Source: PubMed Central journal article supplement (PMC2690842; doi:10.1371/journal.pone.0005917), 2009-06-15

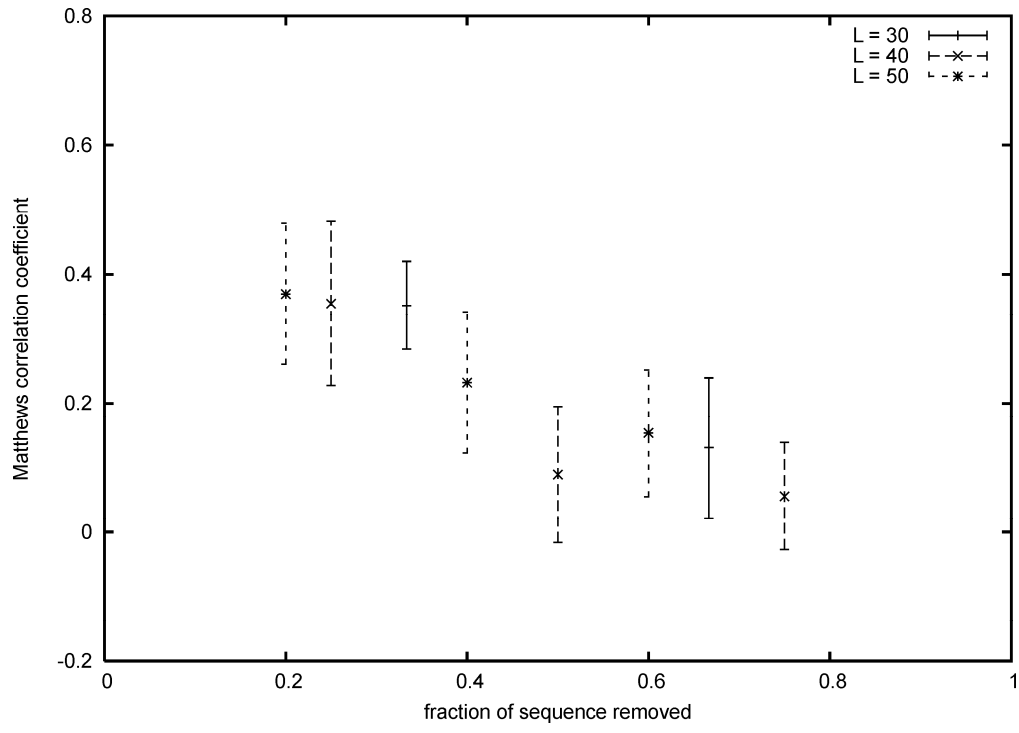

Supplement: pone.0005917.s004.pdf [file pone.0005917.s004.pdf]
